# Supplementary material
Source: PubMed Central journal article supplement (PMC8355077)
Supplement: NIHMS1713671-supplement-2.pdf [file NIHMS1713671-supplement-2.pdf]

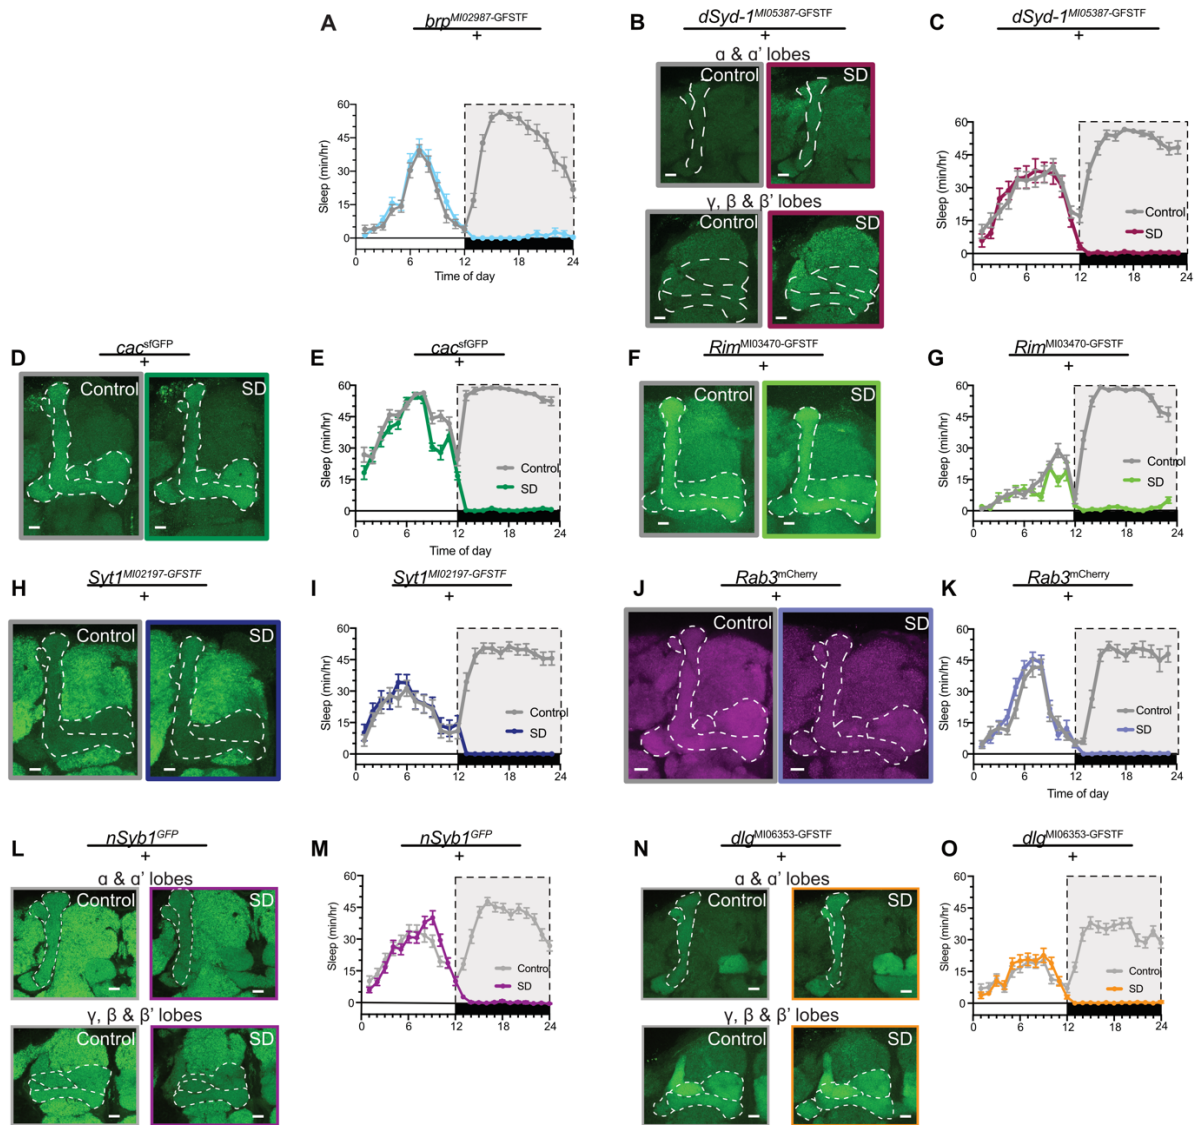

**Figure S1 - Representative images and sleep patterns of synaptic protein reporters, related to Figures 1-2**

(A) Hourly sleep traces of *brp*<sup>MI02987-GFSTF/+</sup> flies. Flies were either allowed ad libitum sleep (gray) or were sleep deprived overnight for 12 hours (blue) before dissection. Two-way repeated-measures ANOVA of hourly sleep time course finds a significant time-by-SD interaction  $F_{(23,3013)}=133.5$ ,  $p<0.0001$ ,  $n=59$  control, 74 SD).

(B-C) Example images of dSyd-1::GFP (A) and sleep traces (B) from both sleep deprived and control *dSyd-1*<sup>MI05387-GFSTF/+</sup> flies. Two-way repeated-measures ANOVA of hourly sleep time course finds a significant time-by-SD interaction  $F_{(23,2553)}=100.2$ ,  $p<0.0001$ ,  $n=64$  control, 49 SD).

(D-E) Confocal images of *Cac::sfGFP* (C) and hourly sleep measurements (D) from *cac<sup>sfGFP/+</sup>* flies that were allowed either *ad libitum* sleep or 12-h overnight sleep deprivation before dissection. Two-way repeated-measures ANOVA of hourly sleep time course finds a significant time-by-SD interaction  $F_{(23,2093)}=122.2$ ,  $p<0.0001$ ,  $n=48$  control, 45 SD).

(F-G) *Rim::GFP* images (E) and hourly sleep traces (F) from sleep deprived and control *Rim<sup>MI03470-GFSTF/+</sup>* flies before dissection. Two-way repeated-measures ANOVA of hourly sleep time course finds a significant time-by-SD interaction  $F_{(23,2392)}=97.51$ ,  $p<0.0001$ ,  $n=58$  control, 48 SD).

(H-I) Example images of *Syt1::GFP* (G) and pre-dissection sleep traces (H) from both sleep deprived and rested control *Syt1<sup>MI02197-GFSTF/+</sup>* flies. Two-way repeated-measures ANOVA of hourly sleep time course finds a significant time-by-SD interaction  $F_{(23,1932)}=84.32$ ,  $p<0.0001$ ,  $n=37$  control, 49 SD).

(J-K) Representative *Rab3::mCherry* images (I) and hourly sleep patterns prior to dissection (J) from *Rab3<sup>mCherry/+</sup>* flies. Two-way repeated-measures ANOVA of hourly sleep time course finds a significant time-by-SD interaction  $F_{(23,1587)}=76.46$ ,  $p<0.0001$ ,  $n=24$  control, 28 SD).

(L-M) Representative *Nsyb::GFP* images (I) and hourly sleep patterns before dissection (M) from *nSyb<sup>GFP/+</sup>* flies. Two-way repeated-measures ANOVA of hourly sleep time course finds a significant time-by-SD interaction  $F_{(23,2070)}=63.05$ ,  $p<0.0001$ ,  $n=44$  control, 48 SD).

(N-O) *Dlg::GFP* images (N) and sleep timecourses before dissection (O) from *dlg<sup>MI06353-GFSTF/+</sup>* flies. Two-way repeated-measures ANOVA of hourly sleep time course finds a significant time-by-SD interaction  $F_{(23,1748)}=44.06$ ,  $p<0.0001$ ,  $n=40$  control, 38 SD).

Scale bars depict 10  $\mu\text{m}$ ; error bars represent SEM for all panels.

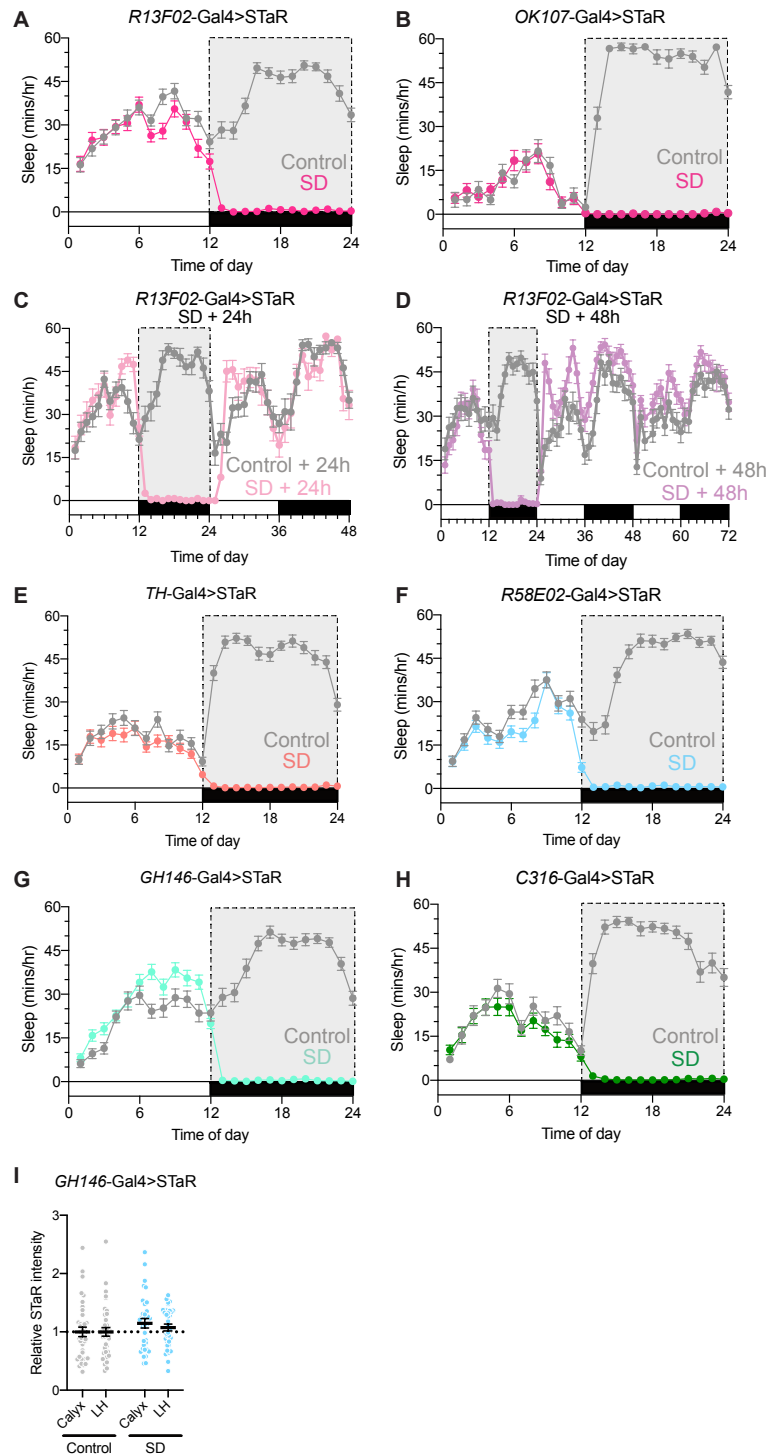

**Figure S2 – Sleep patterns of flies expressing STaR reporter in different MB cell types prior to dissection, related to Figure 3**

(A) Hourly sleep traces of *R13F02-Gal4>STaR* flies that were allowed ad libitum sleep (gray) or were sleep deprived overnight for 12 hours (magenta). Two-way repeated-measures ANOVA of

hourly sleep time course finds a significant time-by-SD interaction ( $F_{(23,1564)}=54.88$ ,  $p<0.0001$ ,  $n=36$  control, 34 SD).

(B) Hourly sleep traces of *OK107-Gal4>STaR* flies that were allowed ad libitum sleep (gray) or were sleep deprived overnight for 12 hours (magenta). Two-way repeated-measures ANOVA of hourly sleep time course finds a significant time-by-SD interaction  $F_{(23,1012)}=95.18$ ,  $p<0.0001$ ,  $n=24$  control, 22 SD).

(C) Hourly sleep traces of *R13F02-Gal4>STaR* flies that were allowed ad libitum sleep (gray) or were sleep deprived overnight for 12 hours (pink), and 24 hours of recovery. Two-way repeated-measures ANOVA of hourly sleep time course finds a significant time-by-SD interaction  $F_{(47,1222)}=27.94$ ,  $p<0.0001$ ,  $n=15$  control, 13 SD).

(D) Hourly sleep traces of *R13F02-Gal4>STaR* flies that were allowed ad libitum sleep (gray) or were sleep deprived overnight for 12 hours (pink), and 48 hours of recovery. Two-way repeated-measures ANOVA of hourly sleep time course finds a significant time-by-SD interaction  $F_{(71,2414)}=21.46$ ,  $p<0.0001$ ,  $n=20$  control, 16 SD).

(E) Hourly sleep traces of *TH-Gal4>STaR* flies that were allowed ad libitum sleep (gray) or were sleep deprived overnight for 12 hours (salmon). Two-way repeated-measures ANOVA of hourly sleep time course finds a significant time-by-SD interaction  $F_{(23,2208)}=90.49$ ,  $p<0.0001$ ,  $n=45$  control, 53 SD).

(F) Hourly sleep traces of *R58E02-Gal4>STaR* flies that were allowed ad libitum sleep (gray) or were sleep deprived overnight for 12 hours (blue). Two-way repeated-measures ANOVA of hourly sleep time course finds a significant time-by-SD interaction  $F_{(23,2070)}=84.49$ ,  $p<0.0001$ ,  $n=44$  control, 48 SD).

(G) Hourly sleep traces of *GHI46-Gal4>STaR* flies that were allowed ad libitum sleep (gray) or were sleep deprived overnight for 12 hours (light green). Two-way repeated-measures ANOVA of hourly sleep time course finds a significant time-by-SD interaction  $F_{(23,2093)}=97.84$ ,  $p<0.0001$ ,  $n=42$  control, 51 SD).

(H) Hourly sleep traces of *C316-Gal4>STaR* flies that were allowed ad libitum sleep (gray) or were sleep deprived overnight for 12 hours (green). Two-way repeated-measures ANOVA of hourly sleep time course finds a significant time-by-SD interaction  $F_{(23,1886)}=68.95$ ,  $p<0.0001$ ,  $n=35$  control, 49 SD).

(I) Relative *GHI46-Gal4>STaR* intensity in olfactory projection neuron axons in the MB calyces (Calyx) and lateral horn (LH). Data from rested controls shown in gray; flies dissected after overnight sleep deprivation depicted in light blue. Two-way repeated measures ANOVA finds no significant main effect for sleep deprivation ( $F_{(1,70)}=1.202$ ,  $p=0.2767$ ,  $n=34-38$ ).

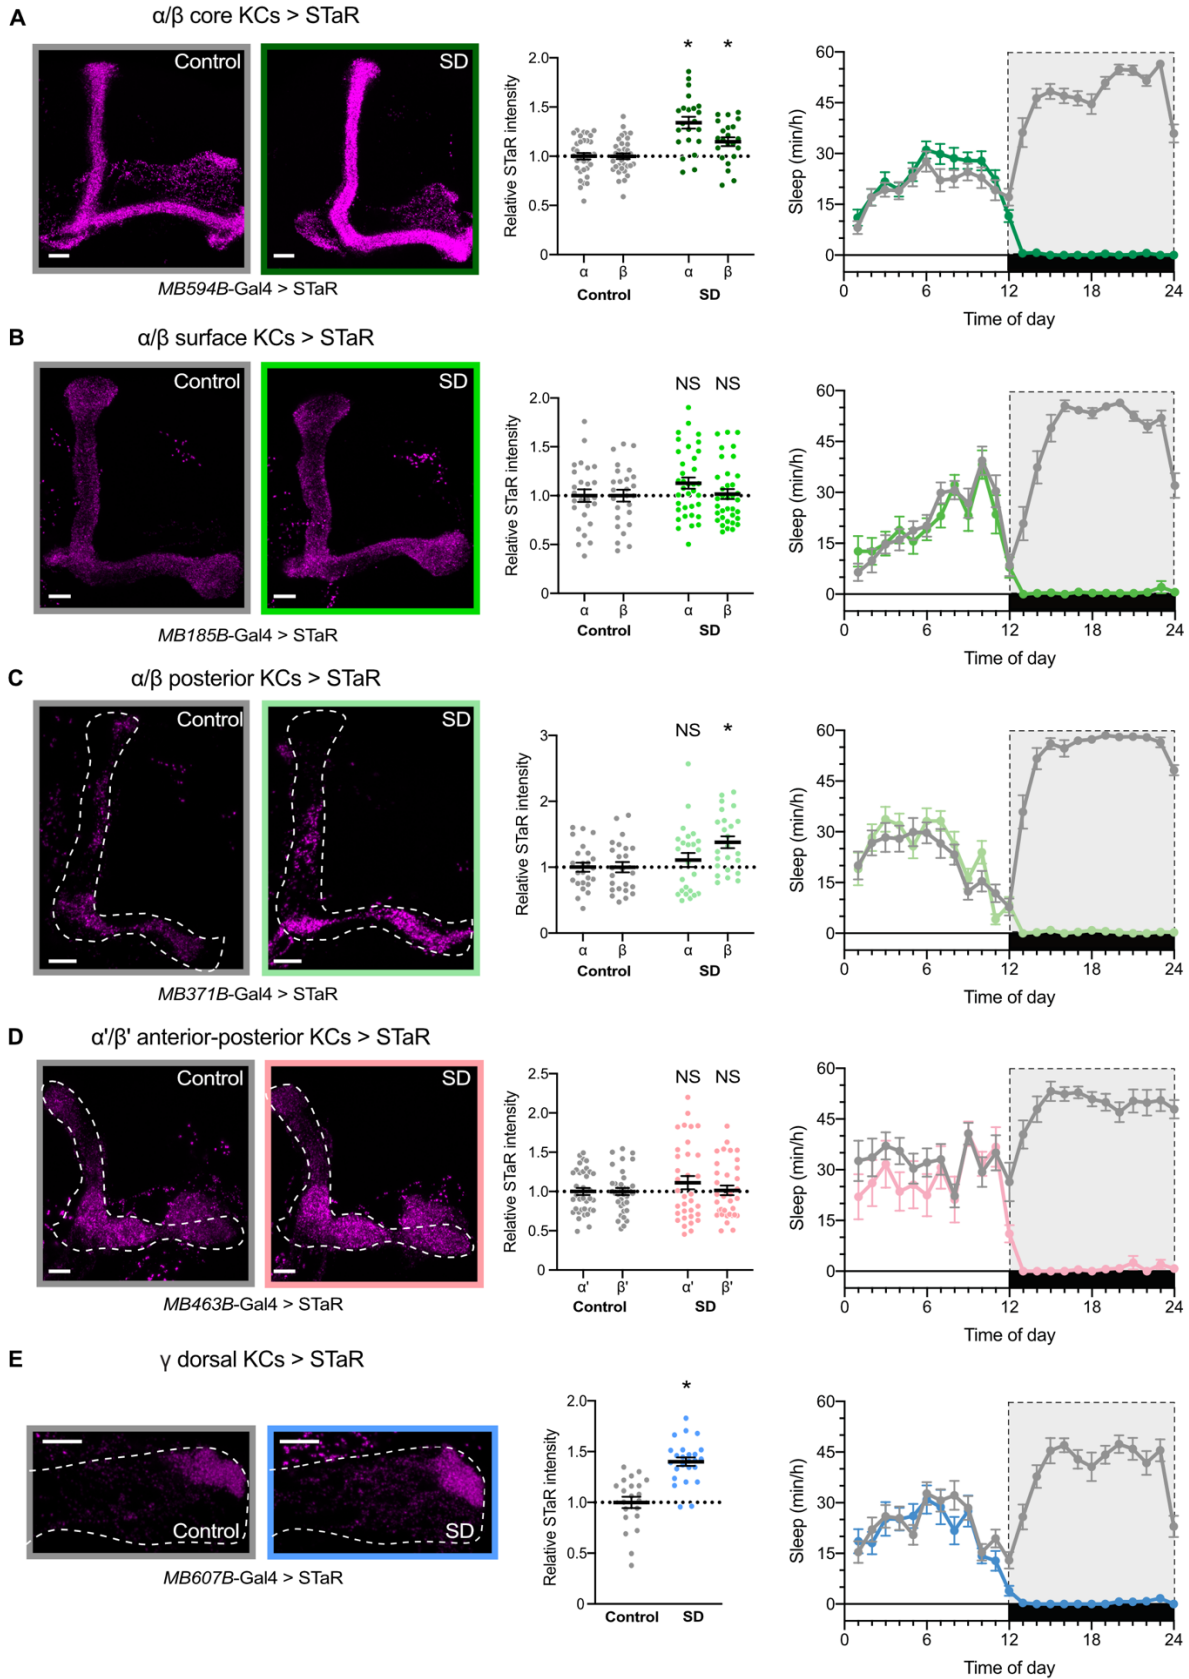

**Figure S3 – Effect of SD on BRP-positive punctae in KC subtypes, related to Figure 3**

(A) Representative images (left) and quantification of BRP::V5 intensity (center) from  $\alpha/\beta$  core KCs in *MB594B>STaR* flies after *ad libitum* sleep (gray) or 12 hours of overnight SD (green). Panel on right shows sleep traces for rested and sleep-deprived *MB594>STaR* flies during the 24-h prior to dissection. Two-way ANOVA finds a significant effect of SD on BRP::V5 ( $F_{(1,54)}=21.52$ ,  $p<0.0001$ ,  $n=22-34$  hemispheres/group).

(B) Representative images (left) and quantification of BRP::V5 intensity (center) from  $\alpha/\beta$  surface KCs in *MB185B>STaR* flies after 12 hours of rest (gray) or 12 hours of overnight SD (green). Right hand panel depicts sleep patterns for *MB185B>STaR* flies during the 24-h before dissection. Two-way ANOVA finds no significant effect of SD on BRP::V5 ( $F_{(1,60)}=0.9211$ ,  $p=0.341$ ,  $n=26-36$  hemispheres/group)

(C) Representative images (left), and quantification of BRP::V5 intensity (center) from  $\alpha/\beta$  posterior KCs *MB371B>STaR* flies after 12 hours of rest (gray) or 12 hours of overnight SD (green). Panel on right shows sleep traces for rested and sleep-deprived *MB371B>STaR* flies during the 24-h prior to dissection. Two-way ANOVA finds a significant effect of SD ( $F_{(1,46)}=4.497$ ,  $p=0.0394$ ,  $n=24$  hemispheres/group).

(D) Representative images (left) and quantification of BRP::V5 intensity (center) from  $\alpha'/\beta'$  anterior-posterior KCs of *MB463B>STaR* flies after 12 hours of rest (gray) or 12 hours of overnight SD (pink). Sleep traces for *MB463B>STaR* from both experimental groups is shown in the right panel. Two-way ANOVA finds no significant effect of SD on BRP::V5 ( $F_{(1,68)}=0.6134$ ,  $p=0.4362$ ,  $n=34-36$  hemispheres/group).

(G) Representative images (left) and BRP::V5 quantification (center) from  $\gamma$  dorsal neurons of *MB607B>STaR* flies after 12 hours of rest (gray) or 12 hours of overnight SD (blue). Presynapses labelled by STaR (BRP::V5) in magenta. Sleep traces for both experimental groups are shown in right-hand panel. Two-tailed T-test finds a significant effect of SD on BRP::V5 in  $\gamma$  dorsal neurons ( $t=5.818$ ,  $p<0.0001$ ,  $n=21-25$  hemispheres/group).

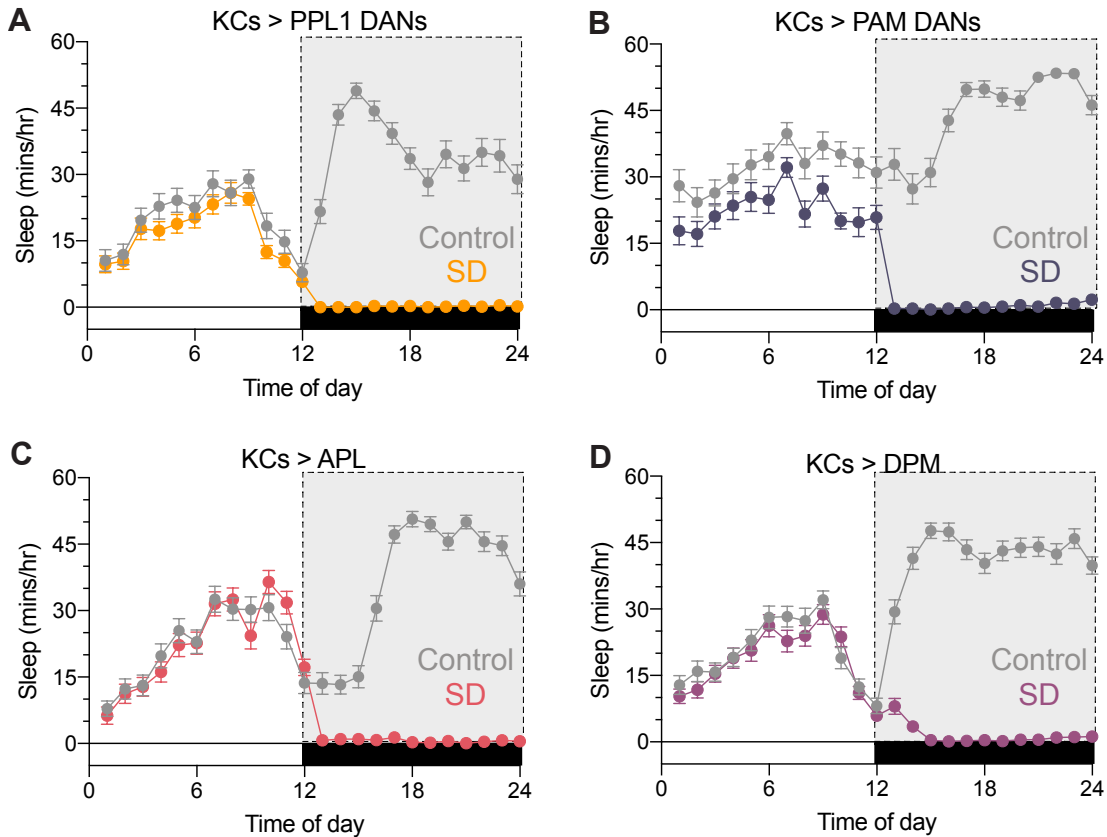

**Figure S4 – Sleep patterns of flies expressing GRASP between KCs and non-MBON cell types prior to dissection, related to Figure 4**

(A) Hourly sleep traces of GRASP/+; *TH-Gal4/MB-LexA* flies that were allowed ad libitum sleep (gray) or were sleep deprived overnight for 12 hours (orange). Two-way repeated-measures ANOVA of hourly sleep time course finds a significant time-by-SD interaction  $F_{(23,1748)}=48.89$ ,  $p<0.0001$ ,  $n=34$  control, 44 SD).

(B) Hourly sleep traces of GRASP/+; *R58E02-Gal4/MB-LexA* flies that were allowed ad libitum sleep (light gray) or were sleep deprived overnight for 12 hours (dark gray). Two-way repeated-measures ANOVA of hourly sleep time course finds a significant time-by-SD interaction  $F_{(23,1978)}=49.86$ ,  $p<0.0001$ ,  $n=42$  control, 46 SD).

(C) Hourly sleep traces of *GHI46-Gal4/GRASP; MB-LexA/+* flies that were allowed ad libitum sleep (gray) or were sleep deprived overnight for 12 hours (pink). Two-way repeated-measures ANOVA of hourly sleep time course finds a significant time-by-SD interaction  $F_{(23,2208)}=69.97$ ,  $p<0.0001$ ,  $n=42$  control, 56 SD).



(D) Hourly sleep traces of GRASP/+; *C316-Gal4/MB-LexA* flies that were allowed ad libitum sleep (light gray) or were sleep deprived overnight for 12 hours (maroon). Two-way repeated-measures ANOVA of hourly sleep time course finds a significant time-by-SD interaction  $F_{(23,2806)}=77.93$ ,  $p<0.0001$ ,  $n=69$  control, 55 SD).

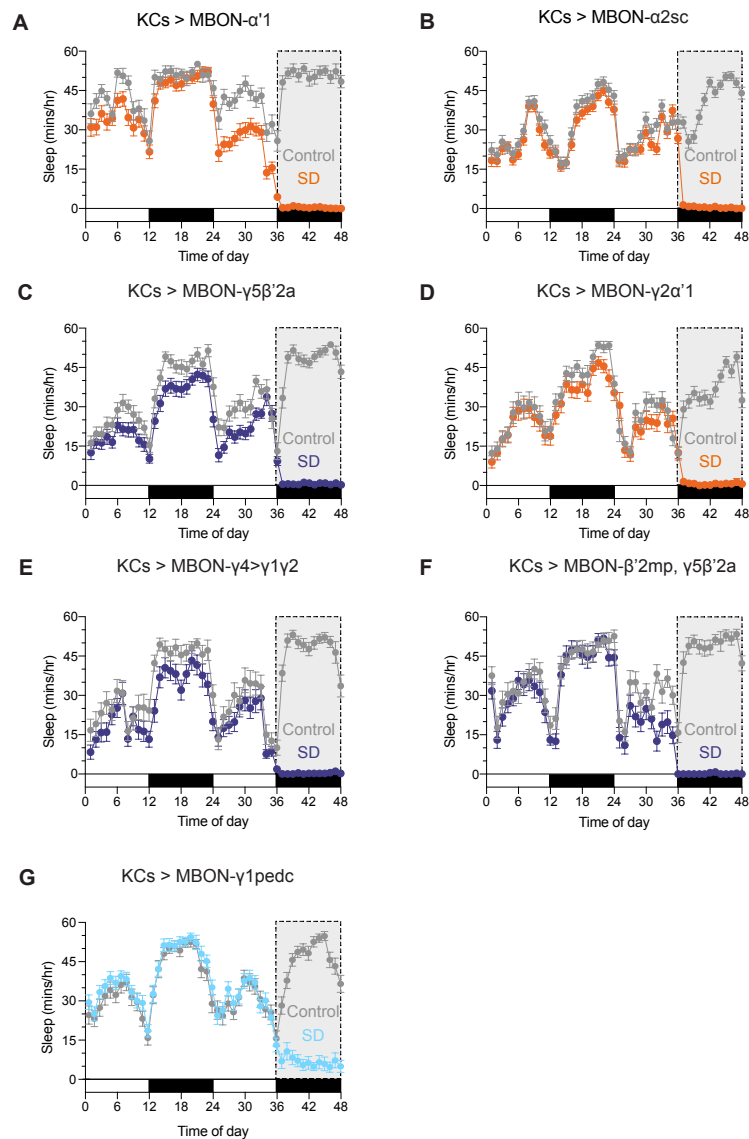

**Figure S5 – Sleep patterns of flies expressing KC>MBON GRASP prior to dissection, related to Figure 5**

(A) Hourly sleep traces of GRASP/+; *MB543B-Gal4/MB-LexA* flies that were allowed 24 hours of baseline sleep, followed by either ad libitum sleep (gray) or sleep deprivation overnight for 12 hours (orange). Two-way repeated-measures ANOVA of hourly sleep time course finds a significant time-by-SD interaction  $F_{(47,2726)}=36.6$ ,  $p<0.0001$ ,  $n=25$  control, 35 SD).

(B) Hourly sleep traces of GRASP/+; *R71D08-Gal4/MB-LexA* flies that were allowed 24 hours of baseline sleep, followed by either ad libitum sleep (gray) or sleep deprivation overnight for 12

hours (orange). Two-way repeated-measures ANOVA of hourly sleep time course finds a significant time-by-SD interaction  $F_{(47,4982)}=42.01$ ,  $p<0.0001$ ,  $n=46$  control, 64 SD).

(C) Hourly sleep traces of GRASP/+; *R66C08*-Gal4/*MB*-LexA flies that were allowed 24 hours of baseline sleep, followed by either ad libitum sleep (gray) or sleep deprivation overnight for 12 hours (dark blue). Two-way repeated-measures ANOVA of hourly sleep time course finds a significant time-by-SD interaction  $F_{(47,3008)}=32.57$ ,  $p<0.0001$ ,  $n=26$  control, 40 SD).

(D) Hourly sleep traces of GRASP/+; *R25D01*-Gal4/*MB*-LexA flies that were allowed 24 hours of baseline sleep, followed by either ad libitum sleep (gray) or sleep deprivation overnight for 12 hours (orange). Two-way repeated-measures ANOVA of hourly sleep time course finds a significant time-by-SD interaction  $F_{(47,3572)}=26.24$ ,  $p<0.0001$ ,  $n=37$  control, 41 SD).

(E) Hourly sleep traces of GRASP/+; *MB434B*-Gal4/*MB*-LexA flies that were allowed 24 hours of baseline sleep, followed by either ad libitum sleep (gray) or sleep deprivation overnight for 12 hours (dark blue). Two-way repeated-measures ANOVA of hourly sleep time course finds a significant time-by-SD interaction  $F_{(47,1974)}=20.94$ ,  $p<0.0001$ ,  $n=20$  control, 24 SD).

F) Hourly sleep traces of GRASP/+; *MB011B*-Gal4/*MB*-LexA flies that were allowed 24 hours of baseline sleep, followed by either ad libitum sleep (gray) or sleep deprivation overnight for 12 hours (dark blue). Two-way repeated-measures ANOVA of hourly sleep time course finds a significant time-by-SD interaction  $F_{(47,1598)}=25.25$ ,  $p<0.0001$ ,  $n=17$  control, 19 SD).

(G) Hourly sleep traces of GRASP/+; *R12G04*-Gal4/*MB*-LexA flies allowed 24h of baseline sleep followed by either ad libitum sleep (gray) or overnight sleep deprivation for 12h (light blue). Two-way repeated-measures ANOVA of hourly sleep time course finds a significant time-by-SD interaction  $F_{(47,2538)}=34.38$ ,  $p<0.0001$ ,  $n=27-29$  flies/group).
